# Supplementary material
Source: PubMed Central journal article supplement (PMC2670480)

**Supplementary Figure 1. iNOS is not expressed in T241-VEGF-C ear tumors.** (A) Lymphatic vessels in T241-VEGF-C tumors were visualized by ferritin-lymphangiography (11) and stained for iNOS. No iNOS expression was detected in the lymphatic endothelium. (B) T241-VEGF-C ear tumor homogenates were separated on SDS-PAGE and immunoblotted for eNOS and iNOS. eNOS was readily detectable in all 4 tumor samples tested, whereas iNOS was undetectable. Actin served as a protein loading control. T1-T4; Tumor 1 – Tumor 4.

**A** Ferritin lymphangiography  
+ anti-iNOS staining

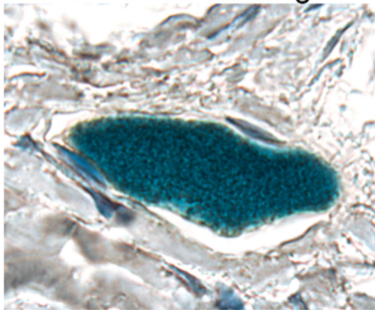

**B**

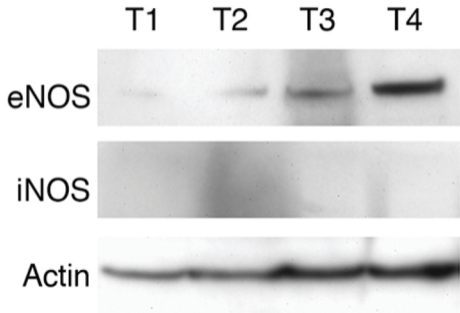

Supplement: NIHMS95505-supplement-01.pdf [file NIHMS95505-supplement-01.pdf]
